# Supplementary material
Source: Springer Nature journal article supplement (https://www.springermedizin.de/resource/supplementary/13058_2013_3553_MOESM23_ESM.pdf/9703942)

### Adipose gene expression changes during development

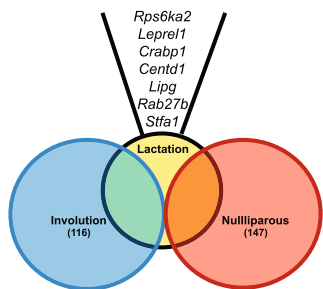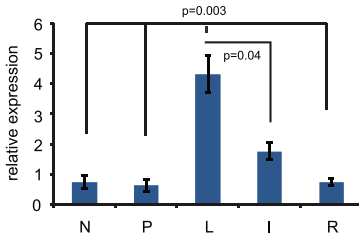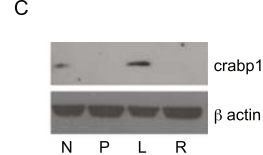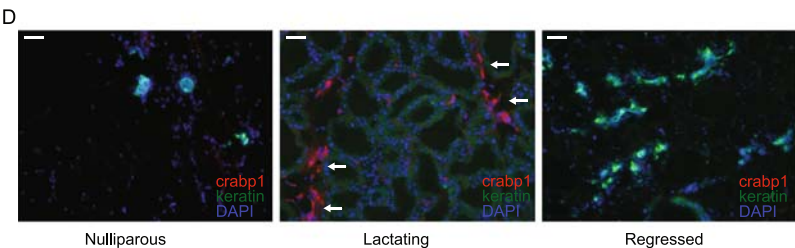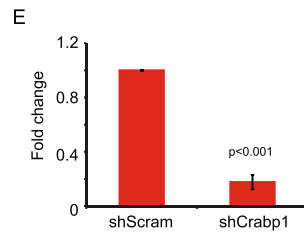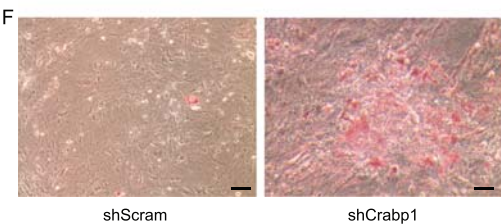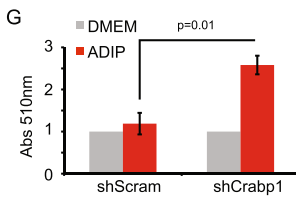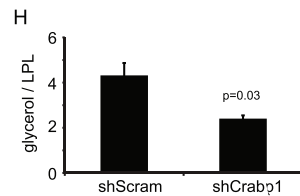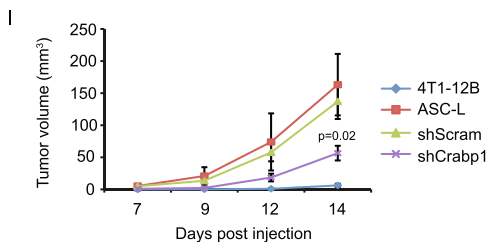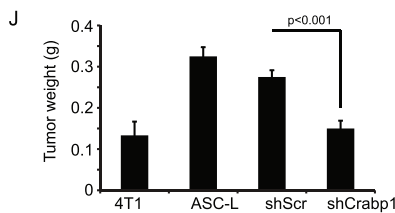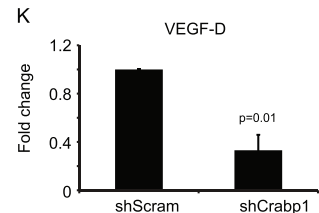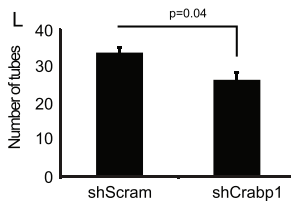

Supplement: MOESM23 [file 9703942]
